# Supplementary material
Source: publisher figshare collection journal article supplement (https://acs.figshare.com/ndownloader/files/4030951)
Supplement: Supplementary file 1 [file 4030951]

 
data_s12080 
  
_audit_creation_method            SHELXL-97 
_chemical_name_systematic 
; 
 ? 
; 
_chemical_name_common             ? 
_chemical_melting_point           ? 
_chemical_formula_moiety          ? 
_chemical_formula_sum 
 'C13 H20 O5' 
_chemical_formula_weight          256.29 
  
loop_ 
 _atom_type_symbol 
 _atom_type_description 
 _atom_type_scat_dispersion_real 
 _atom_type_scat_dispersion_imag 
 _atom_type_scat_source 
 'C'  'C'   0.0033   0.0016 
 'International Tables Vol C Tables 4.2.6.8 and 6.1.1.4' 
 'H'  'H'   0.0000   0.0000 
 'International Tables Vol C Tables 4.2.6.8 and 6.1.1.4' 
 'O'  'O'   0.0106   0.0060 
 'International Tables Vol C Tables 4.2.6.8 and 6.1.1.4' 
  
_symmetry_cell_setting            monoclinic 
_symmetry_space_group_name_H-M    C2/c 
  
loop_ 
 _symmetry_equiv_pos_as_xyz 
 'x, y, z' 
 '-x, y, -z+1/2' 
 'x+1/2, y+1/2, z' 
 '-x+1/2, y+1/2, -z+1/2' 
 '-x, -y, -z' 
 'x, -y, z-1/2' 
 '-x+1/2, -y+1/2, -z' 
 'x+1/2, -y+1/2, z-1/2' 
  
_cell_length_a                    7.1037(3) 
_cell_length_b                    19.0334(8) 
_cell_length_c                    10.0969(7) 
_cell_angle_alpha                 90.00 
_cell_angle_beta                  107.430(8) 
_cell_angle_gamma                 90.00 
_cell_volume                      1302.49(12) 
_cell_formula_units_Z             4 
_cell_measurement_temperature     150(2) 
_cell_measurement_reflns_used     17707 
_cell_measurement_theta_min       3.0 
_cell_measurement_theta_max       30.5 
  
_exptl_crystal_description        Block 
_exptl_crystal_colour             Colorless 
_exptl_crystal_size_max           0.40 
_exptl_crystal_size_mid           0.30 
_exptl_crystal_size_min           0.20 
_exptl_crystal_density_meas       ? 
_exptl_crystal_density_diffrn     1.307 
_exptl_crystal_density_method     'not measured' 
_exptl_crystal_F_000              552 
_exptl_absorpt_coefficient_mu     0.100 
_exptl_absorpt_correction_type    multi-scan 
_exptl_absorpt_correction_T_min   0.9612 
_exptl_absorpt_correction_T_max   0.9803 
_exptl_absorpt_process_details    'Jacobson, R. (1998) Private Communication' 
  
_exptl_special_details 
; 
 'Rigaku R-AXIS RAPID, Rigaku R-AXIS RAPID imaging plate' 
; 
  
_diffrn_ambient_temperature       150(2) 
_diffrn_radiation_wavelength      0.71075 
_diffrn_radiation_type            MoK\a 
_diffrn_radiation_source          'fine-focus sealed tube' 
_diffrn_radiation_monochromator   graphite 
_diffrn_measurement_device_type   'Rigaku R-AXIS RAPID imaging plate' 
_diffrn_measurement_method        \w 
_diffrn_detector_area_resol_mean  10 
_diffrn_reflns_number             19849 
_diffrn_reflns_av_R_equivalents   0.0189 
_diffrn_reflns_av_sigmaI/netI     0.0094 
_diffrn_reflns_limit_h_min        -10 
_diffrn_reflns_limit_h_max        10 
_diffrn_reflns_limit_k_min        -27 
_diffrn_reflns_limit_k_max        27 
_diffrn_reflns_limit_l_min        -14 
_diffrn_reflns_limit_l_max        14 
_diffrn_reflns_theta_min          3.01 
_diffrn_reflns_theta_max          30.51 
_reflns_number_total              2001 
_reflns_number_gt                 1824 
_reflns_threshold_expression      >2sigma(I) 
  
_computing_data_collection        'CrystalClear-SM Expert 2.0 r12 (Rigaku, 2011)' 
_computing_cell_refinement        'CrystalClear-SM Expert 2.0 r12 (Rigaku, 2011)' 
_computing_data_reduction         'CrystalClear-SM Expert 2.0 r12 (Rigaku, 2011)' 
_computing_structure_solution     'SHELXS-97 (Sheldrick, 2008)' 
_computing_structure_refinement   'SHELXL-97 (Sheldrick, 2008)' 
_computing_molecular_graphics     ? 
_computing_publication_material   'SHELXL-97 (Sheldrick, 2008)' 
  
_refine_special_details 
; 
 Refinement of F^2^ against ALL reflections.  The weighted R-factor wR and 
 goodness of fit S are based on F^2^, conventional R-factors R are based 
 on F, with F set to zero for negative F^2^. The threshold expression of 
 F^2^ > 2sigma(F^2^) is used only for calculating R-factors(gt) etc. and is 
 not relevant to the choice of reflections for refinement.  R-factors based 
 on F^2^ are statistically about twice as large as those based on F, and R- 
 factors based on ALL data will be even larger. 
; 
  
_refine_ls_structure_factor_coef  Fsqd 
_refine_ls_matrix_type            full 
_refine_ls_weighting_scheme       calc 
_refine_ls_weighting_details 
 'calc w=1/[\s^2^(Fo^2^)+(0.0571P)^2^+0.3530P] where P=(Fo^2^+2Fc^2^)/3' 
_atom_sites_solution_primary      direct 
_atom_sites_solution_secondary    difmap 
_atom_sites_solution_hydrogens    geom 
_refine_ls_hydrogen_treatment     constr 
_refine_ls_extinction_method      none 
_refine_ls_extinction_coef        ? 
_refine_ls_number_reflns          2001 
_refine_ls_number_parameters      84 
_refine_ls_number_restraints      0 
_refine_ls_R_factor_all           0.0392 
_refine_ls_R_factor_gt            0.0368 
_refine_ls_wR_factor_ref          0.1017 
_refine_ls_wR_factor_gt           0.0992 
_refine_ls_goodness_of_fit_ref    1.102 
_refine_ls_restrained_S_all       1.102 
_refine_ls_shift/su_max           0.000 
_refine_ls_shift/su_mean          0.000 
  
loop_ 
 _atom_site_label 
 _atom_site_type_symbol 
 _atom_site_fract_x 
 _atom_site_fract_y 
 _atom_site_fract_z 
 _atom_site_U_iso_or_equiv 
 _atom_site_adp_type 
 _atom_site_occupancy 
 _atom_site_symmetry_multiplicity 
 _atom_site_calc_flag 
 _atom_site_refinement_flags 
 _atom_site_disorder_assembly 
 _atom_site_disorder_group 
O1 O 0.0000 0.01451(5) 0.2500 0.0450(3) Uani 1 2 d S . . 
C1 C 0.00077(12) 0.08025(4) 0.17792(9) 0.03031(18) Uani 1 1 d . . . 
H1 H -0.1271 0.0932 0.1080 0.036 Uiso 1 1 calc R . . 
C2 C 0.18269(12) 0.09667(4) 0.13667(9) 0.03095(18) Uani 1 1 d . . . 
H2A H 0.1829 0.0678 0.0552 0.037 Uiso 1 1 calc R . . 
H2B H 0.3012 0.0841 0.2139 0.037 Uiso 1 1 calc R . . 
C3 C 0.19293(12) 0.17428(4) 0.10103(8) 0.02705(17) Uani 1 1 d . . . 
H3A H 0.2967 0.1807 0.0550 0.032 Uiso 1 1 calc R . . 
H3B H 0.0655 0.1884 0.0342 0.032 Uiso 1 1 calc R . . 
C4 C 0.23643(10) 0.22182(4) 0.22570(7) 0.02264(16) Uani 1 1 d . . . 
O2 O 0.31817(10) 0.20492(3) 0.34383(6) 0.03313(16) Uani 1 1 d . . . 
O3 O 0.17323(10) 0.28719(3) 0.18718(6) 0.03050(16) Uani 1 1 d . . . 
C5 C 0.18433(12) 0.33839(4) 0.29560(8) 0.02608(16) Uani 1 1 d . . . 
H5A H 0.3041 0.3677 0.3106 0.031 Uiso 1 1 calc R . . 
H5B H 0.1910 0.3142 0.3837 0.031 Uiso 1 1 calc R . . 
C6 C 0.0000 0.38443(5) 0.2500 0.02137(19) Uani 1 2 d S . . 
C7 C 0.00274(13) 0.43034(4) 0.12580(8) 0.02688(17) Uani 1 1 d . . . 
H7A H -0.1159 0.4598 0.0987 0.040 Uiso 1 1 calc R . . 
H7B H 0.0057 0.4002 0.0477 0.040 Uiso 1 1 calc R . . 
H7C H 0.1202 0.4604 0.1516 0.040 Uiso 1 1 calc R . . 
  
loop_ 
 _atom_site_aniso_label 
 _atom_site_aniso_U_11 
 _atom_site_aniso_U_22 
 _atom_site_aniso_U_33 
 _atom_site_aniso_U_23 
 _atom_site_aniso_U_13 
 _atom_site_aniso_U_12 
O1 0.0453(5) 0.0203(4) 0.0758(7) 0.000 0.0279(5) 0.000 
C1 0.0279(4) 0.0240(3) 0.0388(4) -0.0051(3) 0.0095(3) 0.0006(3) 
C2 0.0303(4) 0.0248(4) 0.0404(4) -0.0031(3) 0.0147(3) 0.0052(3) 
C3 0.0296(4) 0.0264(3) 0.0266(3) -0.0014(3) 0.0106(3) 0.0050(3) 
C4 0.0202(3) 0.0236(3) 0.0249(3) 0.0021(2) 0.0080(3) 0.0035(2) 
O2 0.0389(4) 0.0300(3) 0.0259(3) 0.0044(2) 0.0026(2) 0.0079(2) 
O3 0.0446(4) 0.0250(3) 0.0206(3) 0.00132(19) 0.0079(2) 0.0118(2) 
C5 0.0308(4) 0.0240(3) 0.0210(3) -0.0011(2) 0.0042(3) 0.0037(3) 
C6 0.0268(5) 0.0177(4) 0.0190(4) 0.000 0.0061(3) 0.000 
C7 0.0365(4) 0.0217(3) 0.0228(3) 0.0032(2) 0.0096(3) 0.0012(3) 
  
_geom_special_details 
; 
 All esds (except the esd in the dihedral angle between two l.s. planes) 
 are estimated using the full covariance matrix.  The cell esds are taken 
 into account individually in the estimation of esds in distances, angles 
 and torsion angles; correlations between esds in cell parameters are only 
 used when they are defined by crystal symmetry.  An approximate (isotropic) 
 treatment of cell esds is used for estimating esds involving l.s. planes. 
; 
  
loop_ 
 _geom_bond_atom_site_label_1 
 _geom_bond_atom_site_label_2 
 _geom_bond_distance 
 _geom_bond_site_symmetry_2 
 _geom_bond_publ_flag 
O1 C1 1.4483(11) . ? 
O1 C1 1.4484(11) 2 ? 
C1 C1 1.4588(18) 2 ? 
C1 C2 1.5045(12) . ? 
C1 H1 1.0000 . ? 
C2 C3 1.5273(11) . ? 
C2 H2A 0.9900 . ? 
C2 H2B 0.9900 . ? 
C3 C4 1.5052(10) . ? 
C3 H3A 0.9900 . ? 
C3 H3B 0.9900 . ? 
C4 O2 1.2034(9) . ? 
C4 O3 1.3402(9) . ? 
O3 C5 1.4501(9) . ? 
C5 C6 1.5275(9) . ? 
C5 H5A 0.9900 . ? 
C5 H5B 0.9900 . ? 
C6 C5 1.5275(9) 2 ? 
C6 C7 1.5334(9) 2 ? 
C6 C7 1.5334(9) . ? 
C7 H7A 0.9800 . ? 
C7 H7B 0.9800 . ? 
C7 H7C 0.9800 . ? 
  
loop_ 
 _geom_angle_atom_site_label_1 
 _geom_angle_atom_site_label_2 
 _geom_angle_atom_site_label_3 
 _geom_angle 
 _geom_angle_site_symmetry_1 
 _geom_angle_site_symmetry_3 
 _geom_angle_publ_flag 
C1 O1 C1 60.48(8) . 2 ? 
O1 C1 C1 59.76(4) . 2 ? 
O1 C1 C2 116.83(6) . . ? 
C1 C1 C2 122.68(9) 2 . ? 
O1 C1 H1 115.3 . . ? 
C1 C1 H1 115.3 2 . ? 
C2 C1 H1 115.3 . . ? 
C1 C2 C3 111.81(6) . . ? 
C1 C2 H2A 109.3 . . ? 
C3 C2 H2A 109.3 . . ? 
C1 C2 H2B 109.3 . . ? 
C3 C2 H2B 109.3 . . ? 
H2A C2 H2B 107.9 . . ? 
C4 C3 C2 113.37(6) . . ? 
C4 C3 H3A 108.9 . . ? 
C2 C3 H3A 108.9 . . ? 
C4 C3 H3B 108.9 . . ? 
C2 C3 H3B 108.9 . . ? 
H3A C3 H3B 107.7 . . ? 
O2 C4 O3 123.77(7) . . ? 
O2 C4 C3 125.84(7) . . ? 
O3 C4 C3 110.38(6) . . ? 
C4 O3 C5 117.85(6) . . ? 
O3 C5 C6 108.07(6) . . ? 
O3 C5 H5A 110.1 . . ? 
C6 C5 H5A 110.1 . . ? 
O3 C5 H5B 110.1 . . ? 
C6 C5 H5B 110.1 . . ? 
H5A C5 H5B 108.4 . . ? 
C5 C6 C5 110.00(8) 2 . ? 
C5 C6 C7 110.72(4) 2 2 ? 
C5 C6 C7 107.47(4) . 2 ? 
C5 C6 C7 107.47(4) 2 . ? 
C5 C6 C7 110.72(4) . . ? 
C7 C6 C7 110.50(8) 2 . ? 
C6 C7 H7A 109.5 . . ? 
C6 C7 H7B 109.5 . . ? 
H7A C7 H7B 109.5 . . ? 
C6 C7 H7C 109.5 . . ? 
H7A C7 H7C 109.5 . . ? 
H7B C7 H7C 109.5 . . ? 
  
_diffrn_measured_fraction_theta_max    1.000 
_diffrn_reflns_theta_full              30.51 
_diffrn_measured_fraction_theta_full   1.000 
_refine_diff_density_max    0.346 
_refine_diff_density_min   -0.174 
_refine_diff_density_rms    0.048 
